# Supplementary material for: Pd nanocube decoration onto flexible nanofibrous mats of core–shell polymer–ZnO nanofibers for visible light photocatalysis
Source: Royal Society of Chemistry journal article supplement (doi:10.1039/c7nj00187h), 2017-01-01
Supplement: c7nj00187h1.pdf [file c7nj00187h1.pdf]

## Supporting Information

### **Pd Nanocube Decoration onto Flexible Nanofibrous Mats of Core-Shell Polymer-ZnO Nanofibers for Visible Light Photocatalysis**

Osman Arslan<sup>a\*</sup>, Fuat Topuz<sup>a</sup>, Hamit Eren<sup>b</sup>, Necmi Biyikli<sup>c</sup>, Tamer Uyar<sup>a,b\*</sup>

<sup>a</sup> UNAM-National Nanotechnology Research Center, Bilkent University, 06800, Ankara, TURKEY

<sup>b</sup> Institute of Materials Science & Nanotechnology, Bilkent University, 06800, Ankara, TURKEY

<sup>c</sup> Electrical and Computer Engineering Department, Utah State University, Logan, UT 84322-4120, USA

\*Corresponding authors: (OA: arslan@unam.bilkent.edu.tr, TU: uyar@unam.bilkent.edu.tr)

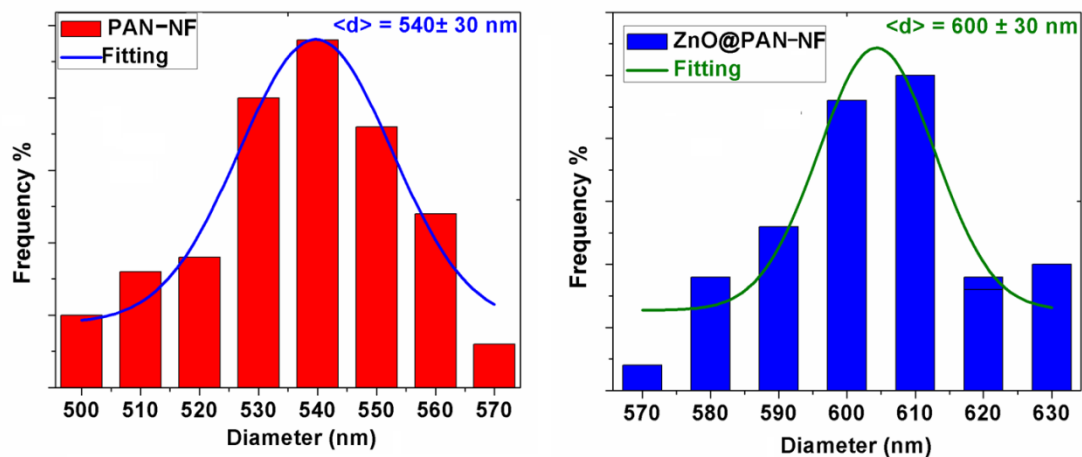

Figure S1 : Average fiber diameter distribution of a) PAN-NF b) ZnO@PAN-NF.

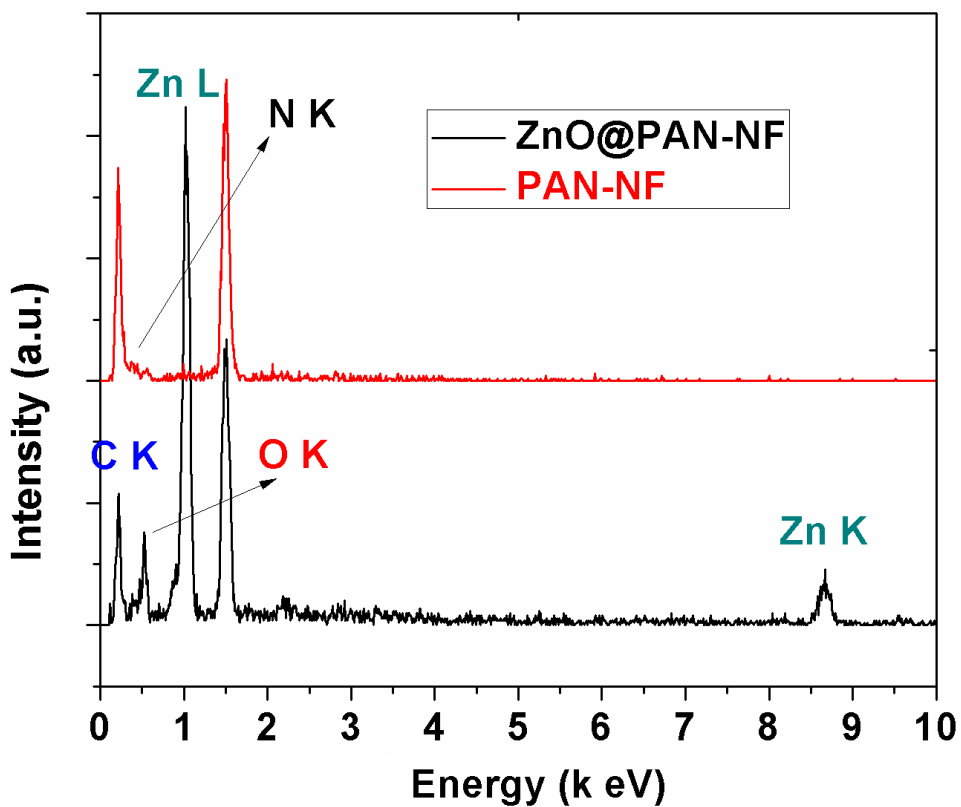

Figure S2 : EDX analysis of the a) PAN and b) ZnO@PAN nanofibers.

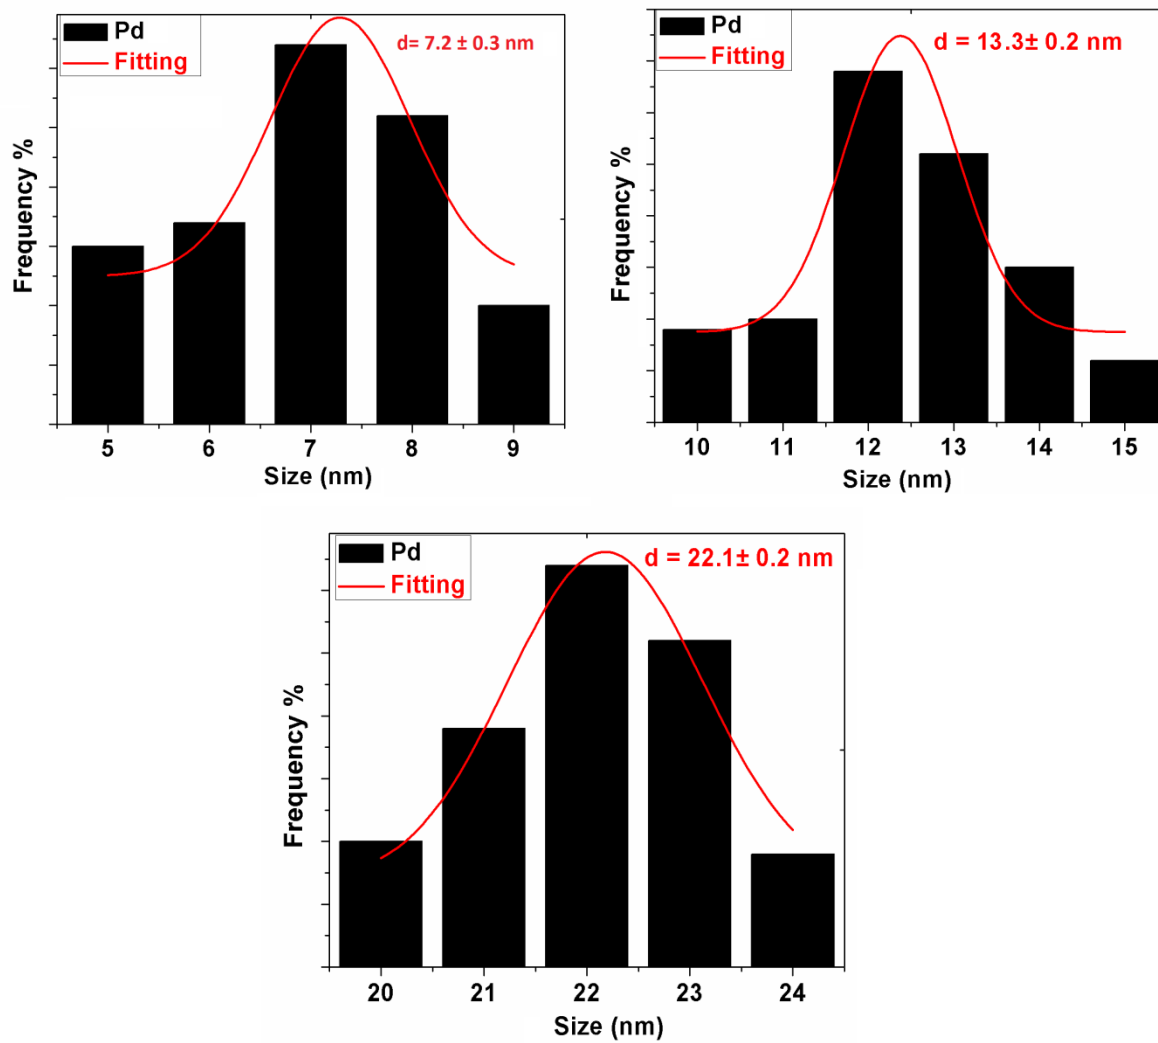

Figure S3 : Average particle size analysis of the as-synthesized Pd nanocubes.

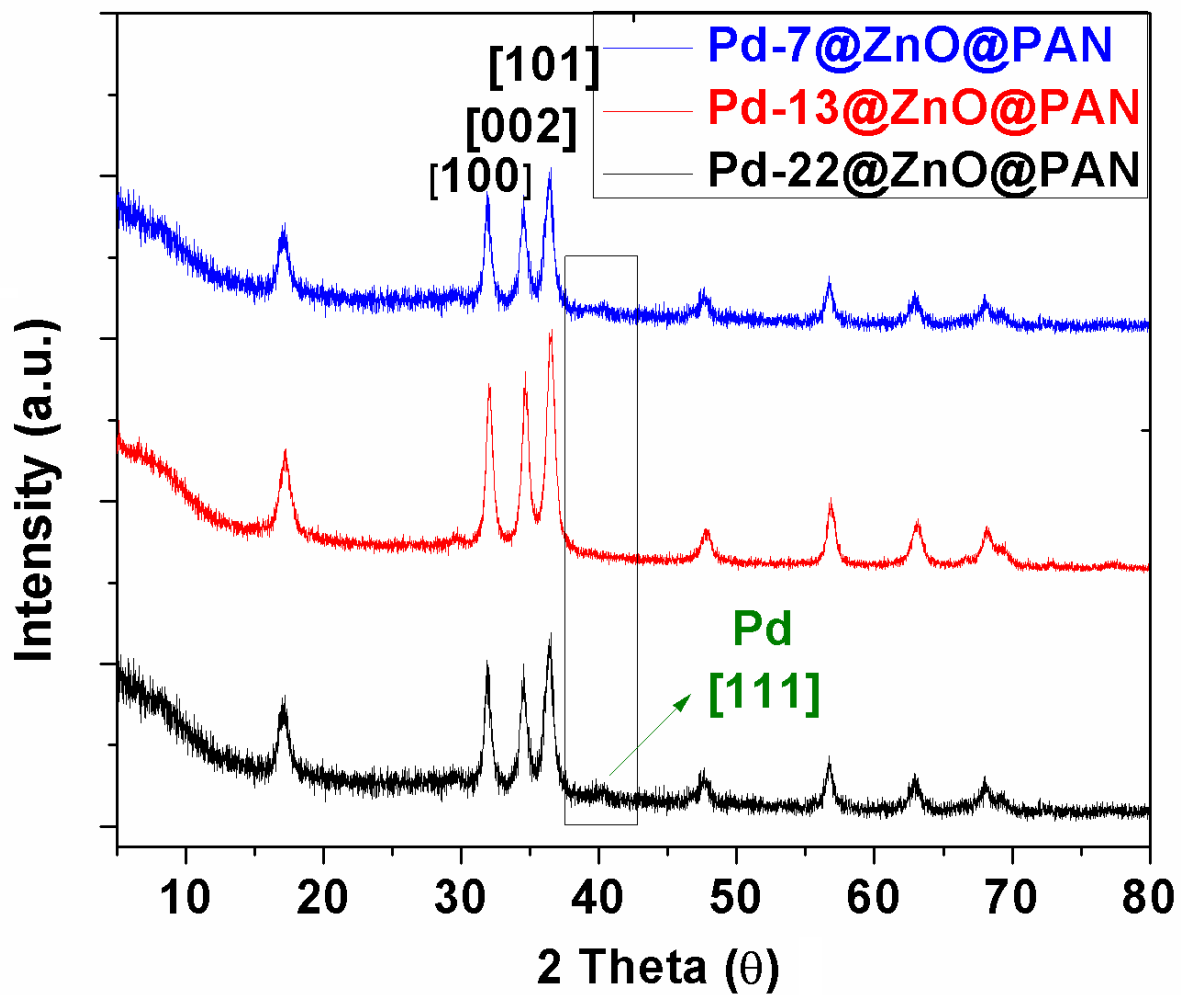

Figure S4: XRD patterns of the 3 different sized Pd nanocube decorated ZnO@PAN-NF

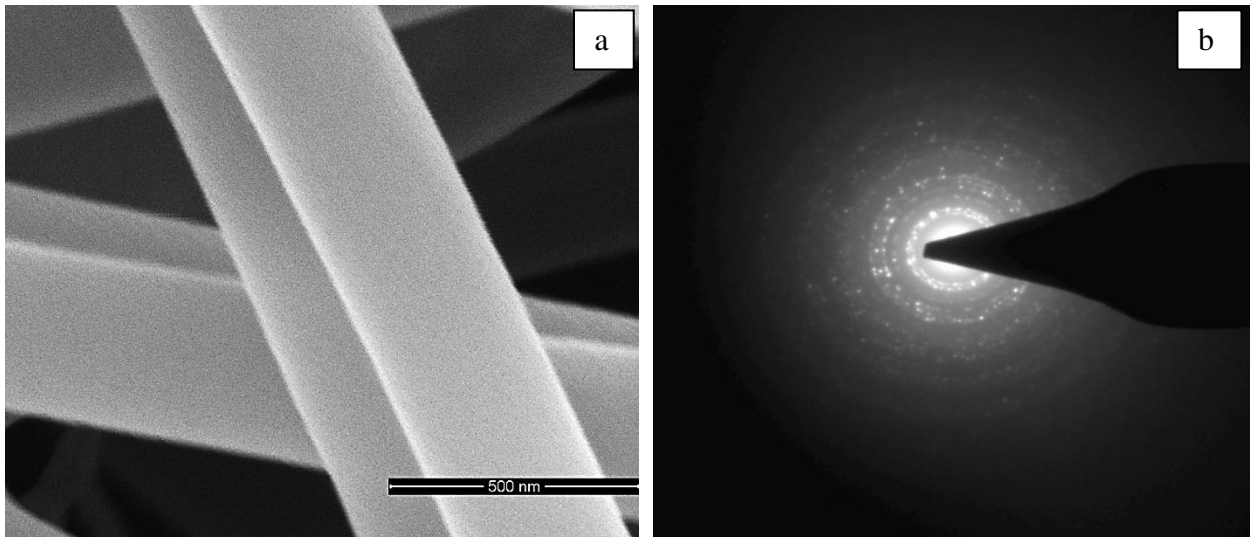

Figure S5 : a) High magnification SEM image of the ZnO@PAN-NF b) SAED pattern of the ZnO@PAN-NF.

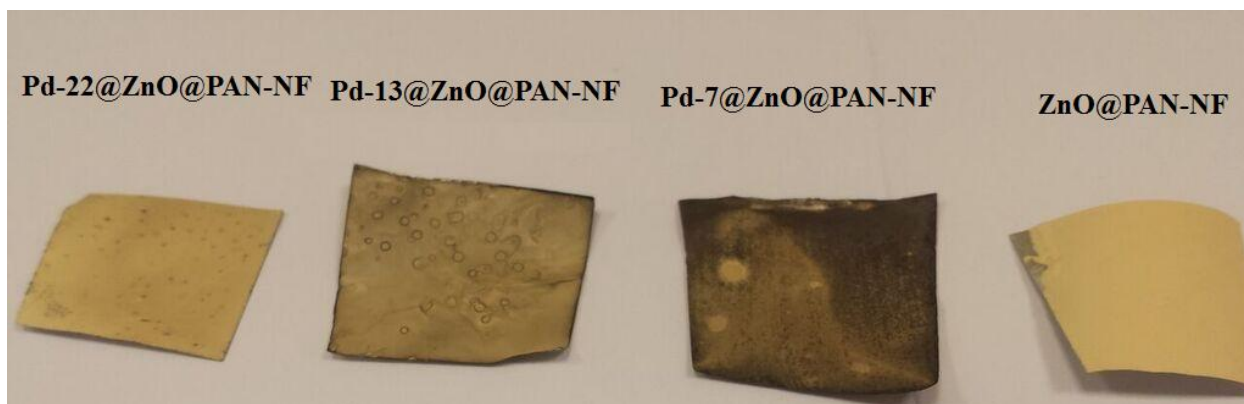

Figure S6: Visual observation of the Pd nanocube decoration onto the ZnO@PAN-NF.

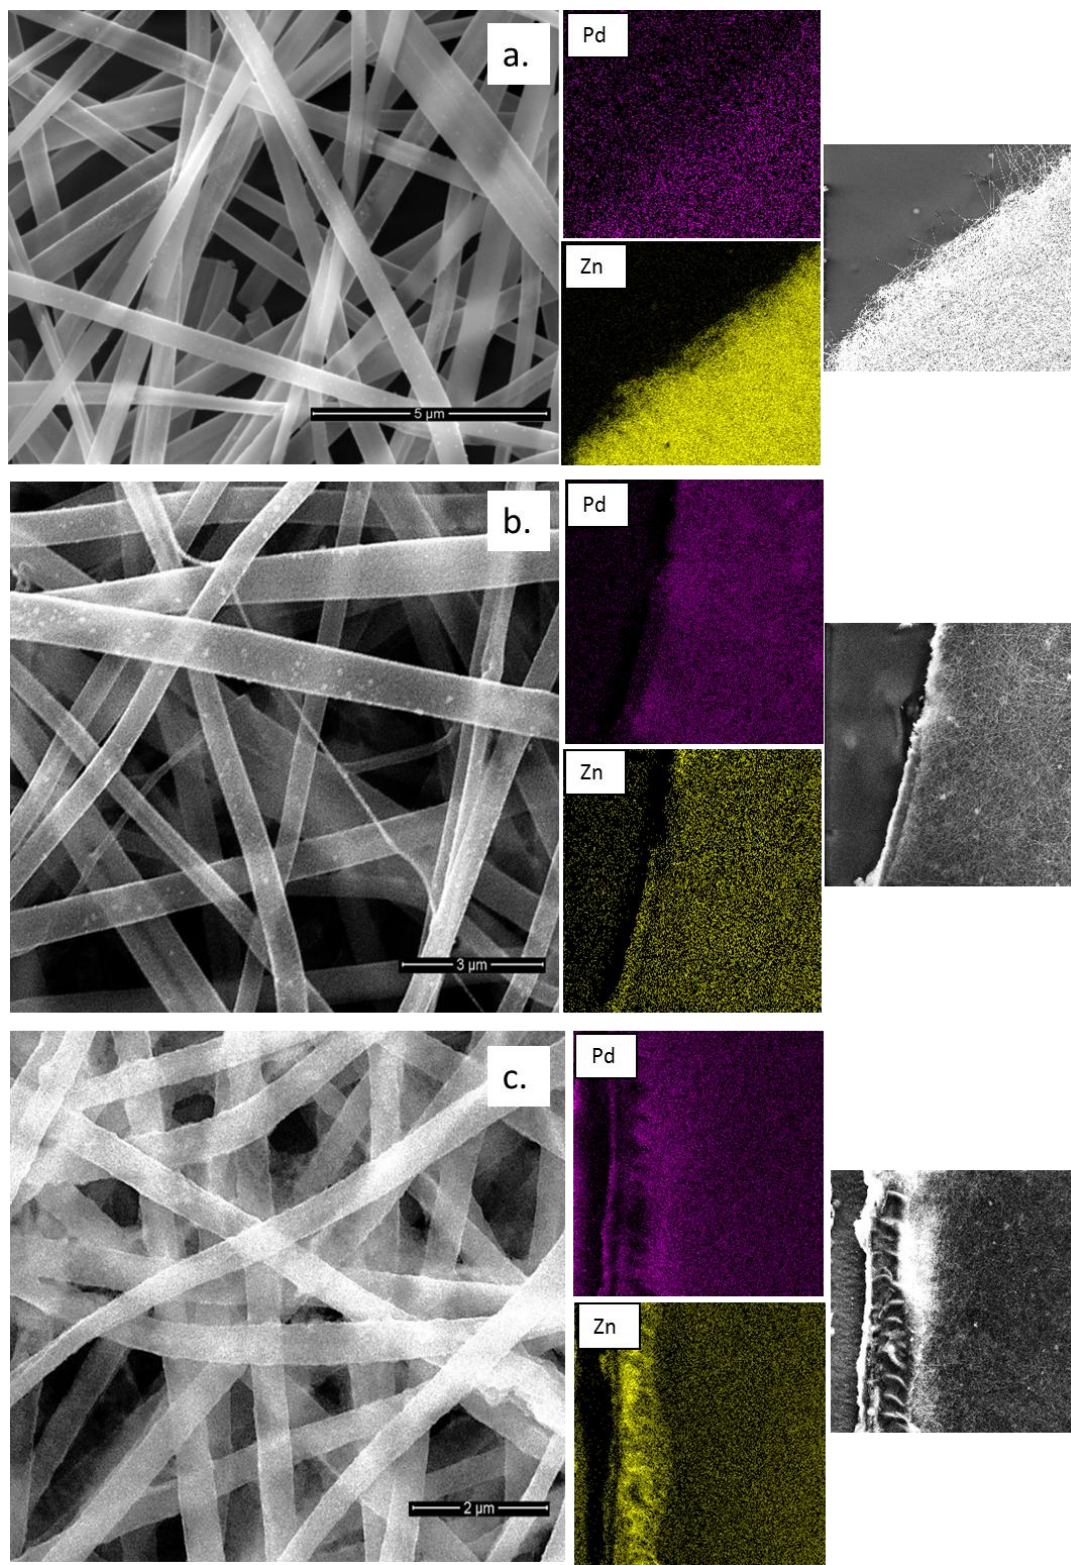

Figure S7: SEM and EDX atomic mapping of the Pd nanocube decorated ZnO@PAN-NF mats. a) Pd-7@ZnO@PAN-NF, b) Pd-13@ZnO@PAN-NF and c) Pd-22@ZnO@PAN-NF.

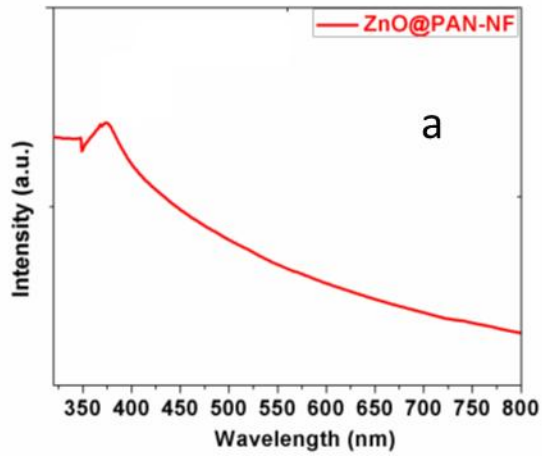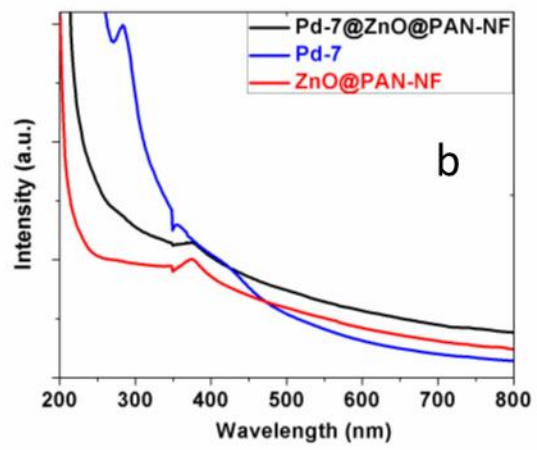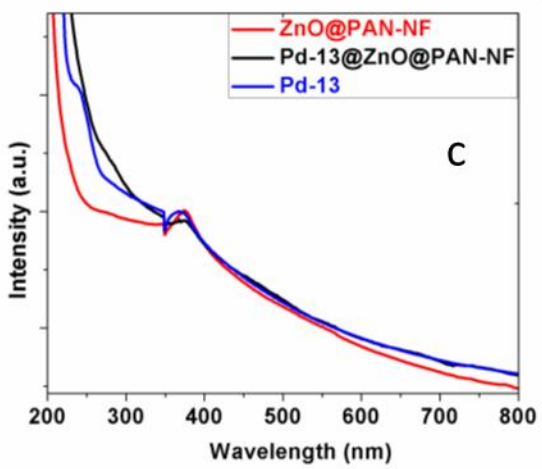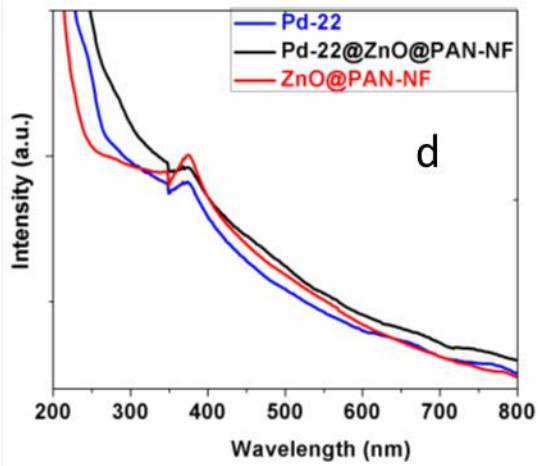

S8: UV-Vis absorption spectra of the a) ZnO@PAN-NF and comparison of the different size Pd decorated nanocomposite systems with respect to Pd nanocube and ZnO@PAN-NF b) Pd-7@ZnO@PAN-NF c) Pd-13@ZnO@PAN-NF d) Pd-22@ZnO@PAN-NF.



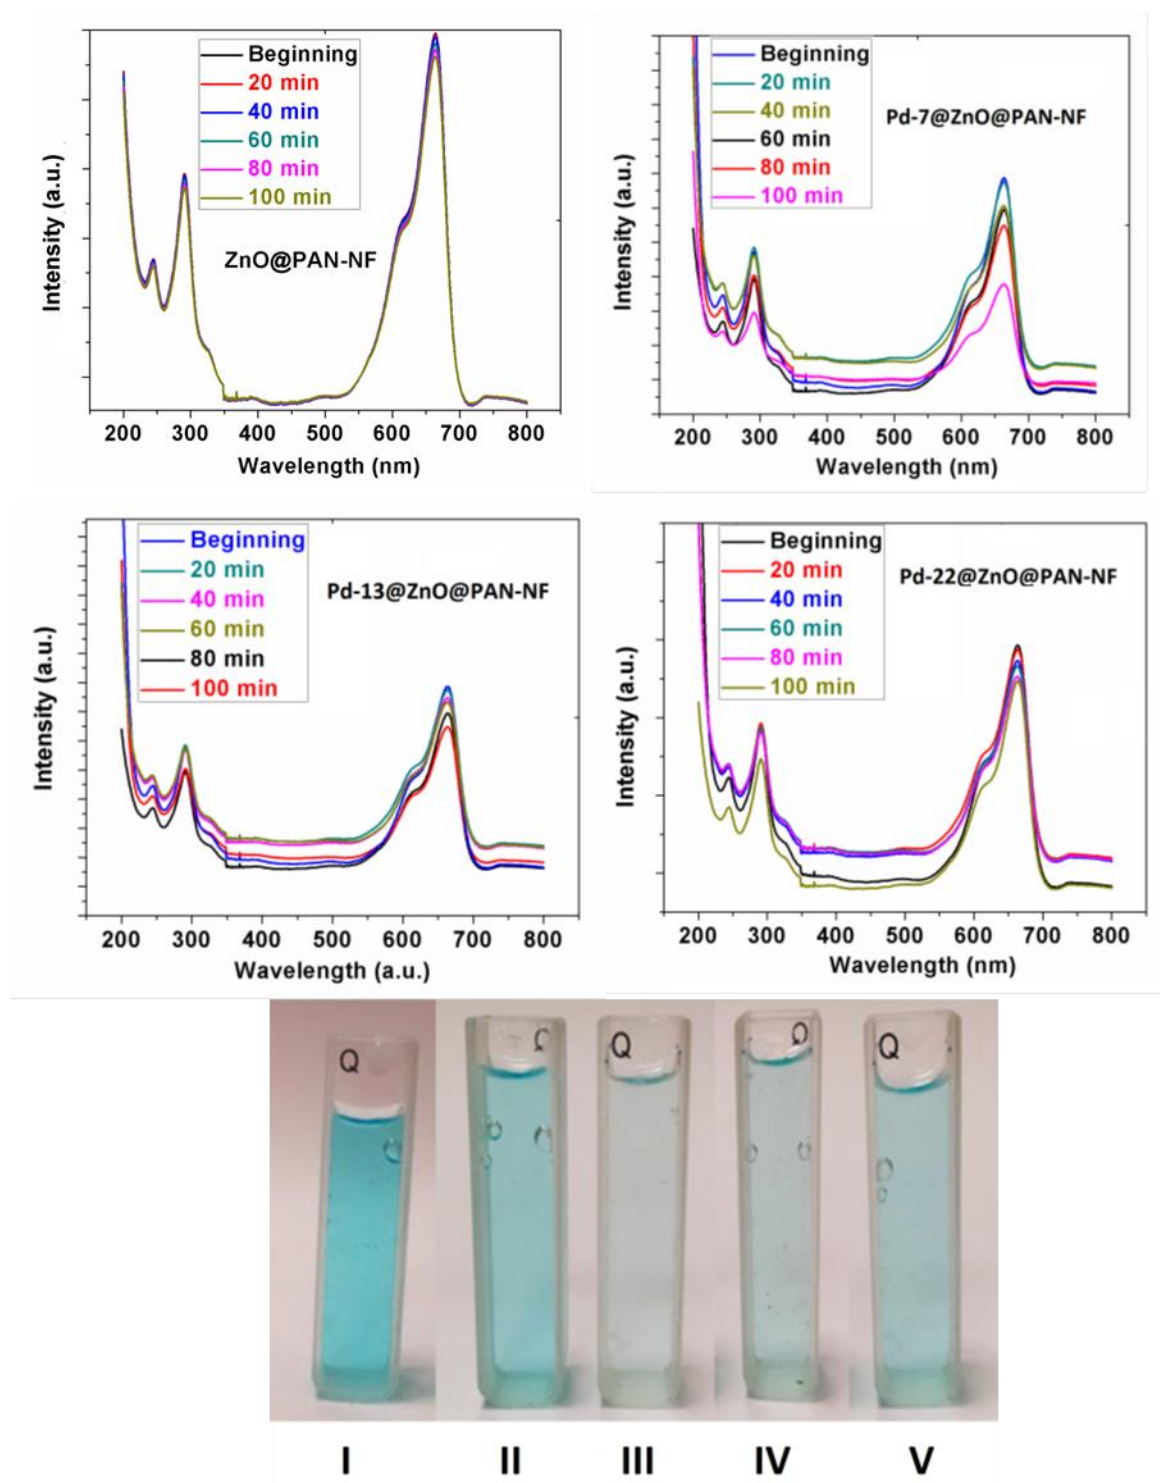

Figure S9: UV-Visible investigation of the MB decomposition for the ZnO@PAN-NF and different size Pd decorated ZnO@PAN-NF samples with visual decomposition profiles of MB solution (I: beginning, II: after ZnO@PAN-NF, III: after Pd-7@ZnO@PAN-NF, IV: after Pd-13@ZnO@PAN-NF and V: after Pd-22@ZnO@PAN-NF treatment).

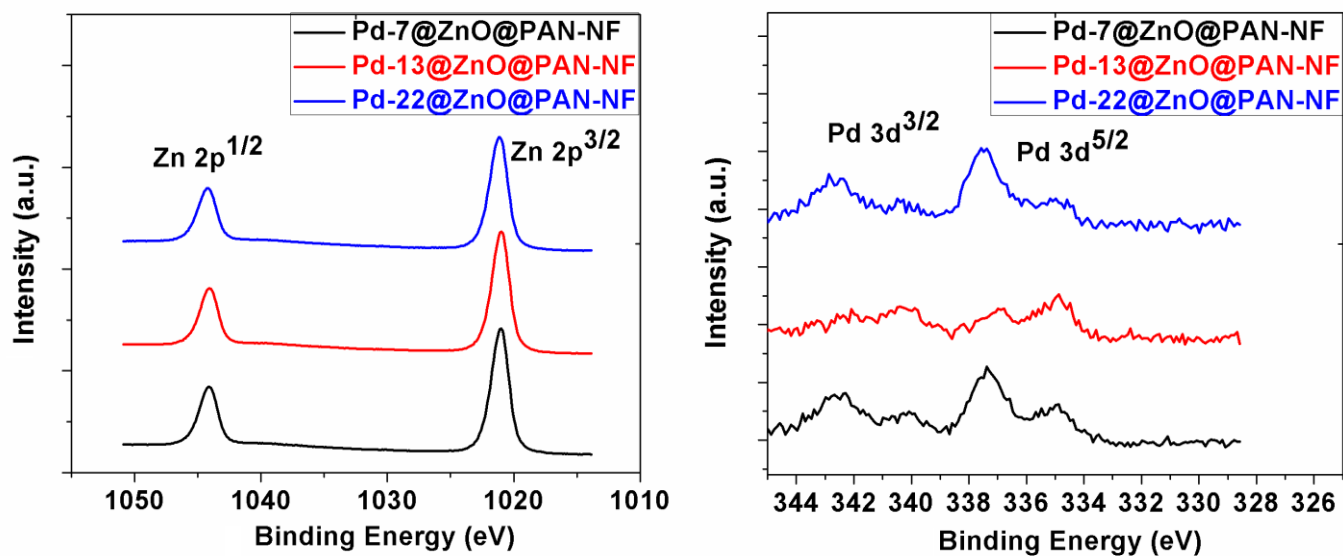

|       | Pd (%) | Zn (%) | O (%) | C (%) |
|-------|--------|--------|-------|-------|
| Pd-7  | 0.79   | 33.4   | 36.8  | 29.2  |
| Pd-13 | 0.54   | 32.6   | 37.2  | 29.8  |
| Pd-22 | 0.49   | 31.2   | 38.1  | 30.0  |

Figure S10: High resolution Zn 2p and Pd 3d XPS peaks and composition table of each atomic ratios in Pd decorated ZnO@PAN-NF

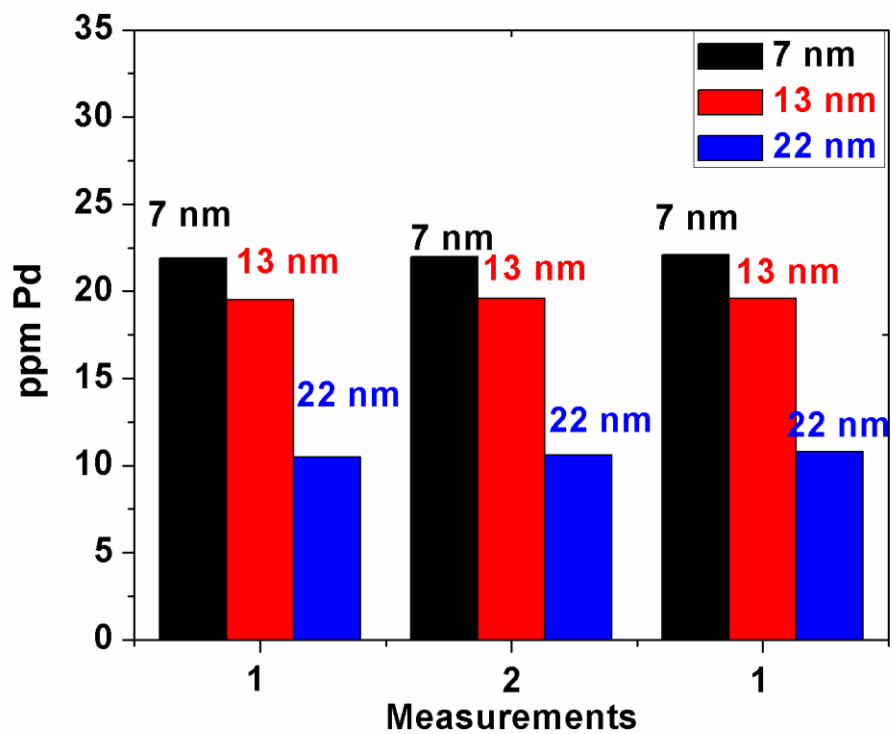

Figure S11: ICP-MS concentration detection of the decorated Pd nanocubes on the PAN@ZnO-NF with 3 different measurements
